# Supplementary material
Source: PubMed Central journal article supplement (PMC2698658)
Supplement: fj.08-121152_1.pdf [file fj.08-121152_1.pdf]

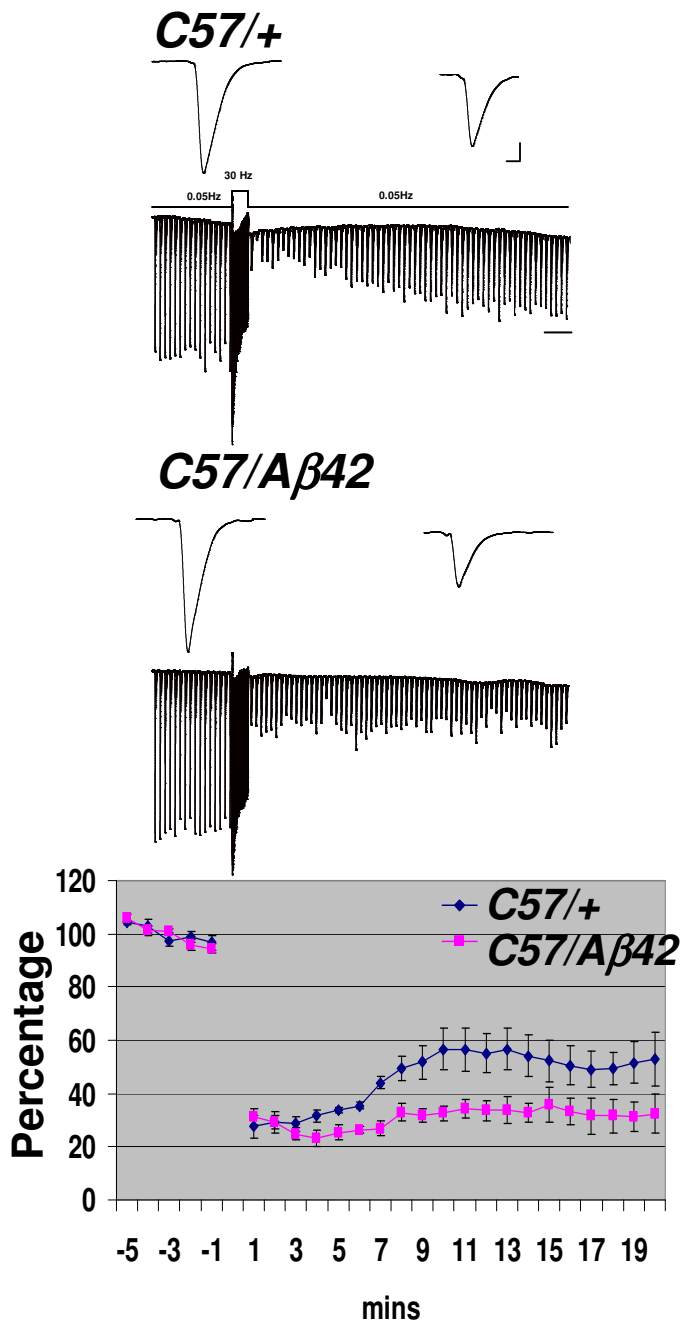

**Supplemental Fig. 1. Enhancement of LTD induced by expression of Aβ42 peptide in muscle cells.** LTD is enhanced in *C57/Aβ* larvae with muscle expression of Aβ peptide. EJCs were recorded in 0.4mM Ca<sup>2+</sup> saline. The horizontal bar represents 2 mins. Representative EJCs traces for each genotypes are shown in top panels. n=5, 5 for *C57/+* and *C57/Aβ*. Scale: 10nA (vertical), 7.5ms (horizontal).
